# Supplementary material
Source: PubMed Central journal article supplement (PMC4492369)
Supplement: 10.1534_115.176594_genetics.115.176594-1.pdf [file 10.1534_115.176594_genetics.115.176594-1.pdf]

## Supporting Information inventory

Figure S1 Schematic of the Cas9/sgRNA-targeting sites at the *Tet1* and *Tet2* loci, and RFLP genotyping strategy

Figure S2 CRISPR/Cas9 mediated gene editing delivered by ZEN on the C57BL/6NJ strain.

Table S1. Effect of voltage and pulse interval on embryo survival

Table S2. Composition of the electroporation solution on embryo survival

Table S3. CRISPR/Cas-mediated HDR at the *Tet2* locus in mouse embryos delivered by electroporation

Table S4 Off target analysis in four mice carrying targeted *Tet2* mutation

Table S5. Oligonucleotides used in this study.

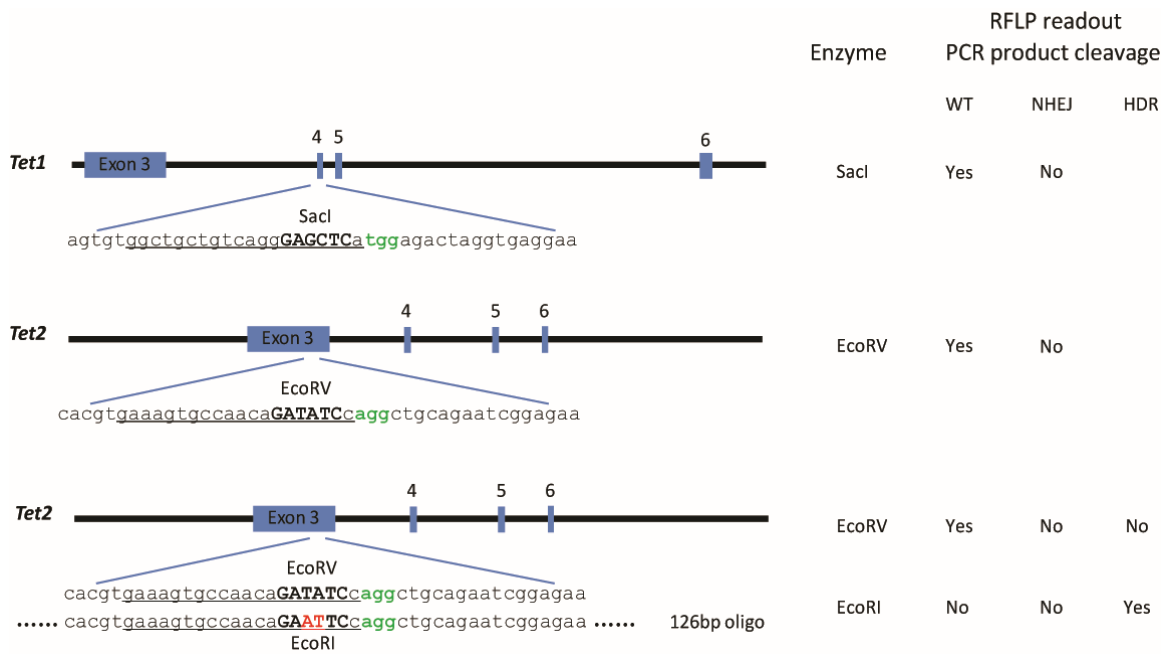

**Figure S1 Schematic of the Cas9/sgRNA-targeting sites at the *Tet1* and *Tet2* loci, and RFLP genotyping strategy.** The sgRNA-targeting sequence is underlined, and the protospacer-adjacent motif (PAM) sequence colored in green. Restriction sites at the target regions are bold and capitalized. Restriction enzymes used for RFLP analysis and the expected results from different alleles are shown in the right panel. Oligonucleotide directed 2bp changes are colored in red.

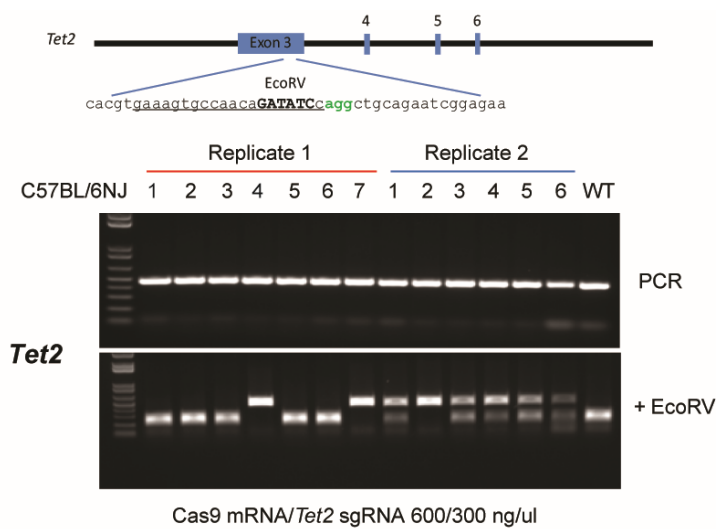

**Figure S2 CRISPR/Cas9 mediated gene editing delivered by ZEN in C57BL/6NJ strain.** The sgRNA-targeting sequence is underlined, and the PAM sequence colored in green. The EcoRV restriction site at the target region is bold and capitalized. RFLP analysis results using EcoRV are shown for mice derived from two replicate experiments.

**Table S1 Effect of voltage and pulse interval on embryo survival**

| <b>Voltage (v)</b> | <b>Pulse Interval (ms)</b> | <b>Zygotes Electroporated</b> | <b>Blastocysts Developed</b> | <b>Embryo Survival Rate</b> |
|--------------------|----------------------------|-------------------------------|------------------------------|-----------------------------|
| 30                 | 100                        | 13                            | 12                           | 92%                         |
| 30                 | 500                        | 13                            | 9                            | 69%                         |
| 30                 | 1000                       | 10                            | 8                            | 80%                         |
| 100                | 100                        | 10                            | 2                            | 20%                         |
| 100                | 500                        | 11                            | 3                            | 27%                         |
| 100                | 1000                       | 11                            | 2                            | 18%                         |
| 300                | 100                        | 14                            | 0                            | 0                           |
| 300                | 500                        | 12                            | 0                            | 0                           |
| 300                | 1000                       | 14                            | 0                            | 0                           |

All zygotes were derived from B6D2F2/J and treated with acidic Tyrode's solution for 10 seconds before electroporation. The embryos used in this experiment had not been exposed to CRISPR/Cas9 reagents.

**Table S2 Composition of electroporation solution on embryo survival**

| <b>TE (ul)</b> | <b>Opti-MEM (ul)</b> | <b>Total Volume (ul)</b> | <b>Zygotes Electroporated</b> | <b>Blastocysts Developed</b> | <b>Embryo Survival Rate</b> |
|----------------|----------------------|--------------------------|-------------------------------|------------------------------|-----------------------------|
| 20             | 0                    | 20                       | 19                            | 7                            | 37%                         |
| 20             | 0                    | 20                       | 19                            | 9                            | 47%                         |
| 15             | 5                    | 20                       | 17                            | 13                           | 76%                         |
| 15             | 5                    | 20                       | 21                            | 16                           | 76%                         |
| 10             | 10                   | 20                       | 14                            | 13                           | 93%                         |
| 10             | 10                   | 20                       | 18                            | 17                           | 94%                         |
| 0              | 20                   | 20                       | 17                            | 17                           | 100%                        |
| 0              | 20                   | 20                       | 20                            | 19                           | 95%                         |

All zygotes were derived from B6D2F2/J and treated with acidic Tyrode's solution for 10 seconds before electroporation. Embryos used in this experiment had not been exposed to CRISPR/Cas reagents.

**Table S3 CRISPR/Cas-mediated HDR at the *Tet2* Locus in Mouse Embryos Delivered by Electroporation**

| <b>Group</b> | <b>Cas9/sgRNA/donor oligo Conc. (ng/ul)</b> | <b>Embryos Electroporated</b> | <b>Blastocysts Developed</b> | <b>NHEJ+ HDR</b> | <b>Efficiency</b> | <b>HDR</b> | <b>Efficiency</b> |
|--------------|---------------------------------------------|-------------------------------|------------------------------|------------------|-------------------|------------|-------------------|
| 1            | 400/200/1000                                | 15                            | 12                           | 9                | 75%               | 4          | 33%               |
| 2            | 600/300/1000                                | 15                            | 13                           | 10               | 77%               | 4          | 31%               |

Zygotes were derived from B6D2F2/J and treated with acidic Tyrode's solution for 10 seconds before electroporation. A total of 15 embryos for each concentration were electroporated in a cuvette of 1 mm gap size and in 20 ul of TE/Opti-MEM at 1:1 volume ratio. Following electroporation, the embryos were transferred to 100 ul of M2 media and cultured in vitro for 3.5 days and blastocysts analyzed.

**Table S4 Off target analysis for four mice carrying targeted *Tet2* mutation**

| Site          | Coordinate*                  | Sequence                 | Mismatches | Mutation |
|---------------|------------------------------|--------------------------|------------|----------|
| On Target     | chr3:133148617<br>-133148639 | GAAAGTGCCAACAGATATCCAGG  | none       | yes      |
| Off Target 1  | chr11:31327722<br>-31327744  | aAAAtGTGCaAACAGATATCCTGG | 1,4,9      | No       |
| Off Target 2  | chr8:61482458-<br>61482480   | GAAAagGgCAACAGATATCCTGG  | 5,6,8      | No       |
| Off Target 3  | chr5:134923409<br>-134923431 | GAAcGTGgCAcCAGATATCCTGG  | 4,8,11     | No       |
| Off Target 4  | chr1:73824333-<br>73824355   | GAcAGTGCCAAaAcATATCCTGG  | 3,12,14    | No       |
| Off Target 5  | chr2:150088681<br>-150088703 | cAAAGaGCCAACAGAaATCCAGG  | 1,6,16     | No       |
| Off Target 6  | chr17:36494664<br>-36494686  | GAAgGTGgCAACAGAcATCCTGG  | 4,8,16     | No       |
| Off Target 7  | chr17:36923721<br>-36923743  | GAAgGTGgCAACAGAcATCCTGG  | 4,8,16     | No       |
| Off Target 8  | chr17:36961245<br>-36961267  | GAAgGTGgCAACAGAcATCCTGG  | 4,8,16     | No       |
| Off Target 9  | chr1:89767331-<br>89767353   | GgAAAtGCCAACAGATcTCCTGG  | 2,5,17     | No       |
| Off Target 10 | chr12:4599503-<br>4599525    | GAAAGgGCCAAgAGATgTCCAGG  | 6,12,17    | No       |
| Off Target 11 | chr5:148012894<br>-148012916 | GAAAaTGgCAACAGATAcCCTGG  | 5,8,18     | No       |
| Off Target 12 | chr7:121431500<br>-121431522 | GtAAGTtCCAACAGATATgCTGG  | 2,7,19     | No       |
| Off Target 13 | chr14:26417940<br>-26417962  | GAAgGTGCCAgCAGATATCaAGG  | 4,11,20    | No       |
| Off Target 14 | chr7:115756427<br>-115756449 | GAcAGTGCCAACAGATATagTGG  | 3,19,20    | No       |

\*chromosome coordinate is based on July 2007, NCBI37/mm9.

PCR products were amplified from samples 86EP1, 2, 3, and 4 encompassing the 14 potential off target sites and analyzed by Sanger sequencing. All were found to be wild type at the loci.

**Table S5 Oligonucleotides used in this study.**

Oligonucleotides used in a PCR reaction to generate DNA template for in vitro transcription of the Cas9 mRNA

| Gene | Direction | Sequence (5' to 3')                           | Template                        |
|------|-----------|-----------------------------------------------|---------------------------------|
| Cas9 | F         | TAATACGACTCACTATAGGGAGA<br>CCACC              | Px330 (Cong <i>et al.</i> 2013) |
|      | R         | ATGGACTATAAGGACCACGAC<br>GCGAGCTCTAGgaattctaC |                                 |

Oligonucleotides used in a PCR reaction to generate DNA template for in vitro transcription of the Tet1 and Tet2 single guide RNA

| sgRNA       | Direction | Sequence (5' to 3')                                                                 |
|-------------|-----------|-------------------------------------------------------------------------------------|
| sgRNA       | R         | AAAAGCACCGACTCGGTGCCACTTTTTCAAGTTGATAACGG<br>ACTAGCCTTATTTAACTTGCTATTTCTAGCTCTAAAAC |
| <i>Tet1</i> | F         | TAATACGACTCACTATAG ggctgctgtcagggagctca<br>gtttAagagctaTGCTGGAAAC                   |
| <i>Tet2</i> | F         | TAATACGACTCACTATAG gaaagtccaacagatatcc<br>gtttAagagctaTGCTGGAAAC                    |

Oligonucleotide used as donor for HDR-mediated repair at the *Tet2* locus

| Gene target                      | Sequence (5' to 3')                                                                                                            |
|----------------------------------|--------------------------------------------------------------------------------------------------------------------------------|
| <i>Tet2</i><br>EcoRV to<br>EcoRI | tcactctgtgactataaggctctgactctcaagtcacagaaacacgtgaaagtccaacaGAatTCcaggc<br>tcagaatcggagaaccacgcccagctgcagagcctcaagcaacaaaagcaca |

Forward and reverse primers used to produce DNA template for in vitro transcription of sgRNA and guide sequences for the 10 genes from the study

| Name           | Sequence (5' to 3')                                                             |
|----------------|---------------------------------------------------------------------------------|
| sgRNA_F        | gaaattaatacagactcactatagg(N20)gttttagagctagaaatagc                              |
| sgRNA_R        | aaaagcaccgactcgtgccacttttcaagtgataacggactagccttatttaactgc<br>tatttctagctctaaaac |
| <i>Cd69</i>    | TTCTGAAAAC TTTCTATAA                                                            |
| <i>Cd226</i>   | AAGTCCTGAGTCAGCGGCCA                                                            |
| <i>Clec16a</i> | GAGATGGTGATCATGAAGCT                                                            |
| <i>Cyp27b1</i> | CAACCAGTTGGGCATCGCCA                                                            |
| <i>Fut2</i>    | ATGTAGCATATTCGCCCATC                                                            |
| <i>Ormdl3</i>  | ACACGGGTGATGAACAGTCG                                                            |
| <i>Rgs1</i>    | CGGCAGCCATCTCCATGCCA                                                            |
| <i>Tlr7</i>    | ATTTACAGGTGTTTTCGATG                                                            |



|               |                      |
|---------------|----------------------|
| <i>Tlr8</i>   | CGTCAGAATCCATGACTGAG |
| <i>Tnfsf9</i> | GCACTGACCGACCGTGGTAA |
