# Supplementary material
Source: PubMed Central journal article supplement (PMC4492369)
Supplement: 10.1534_115.176594_genetics.115.176594-2.pdf [file 10.1534_115.176594_genetics.115.176594-2.pdf]

**Table S2 Composition of electroporation solution on embryo survival**

| <b>TE (ul)</b> | <b>Opti-MEM (ul)</b> | <b>Total Volume (ul)</b> | <b>Zygotes Electroporated</b> | <b>Blastocysts Developed</b> | <b>Embryo Survival Rate</b> |
|----------------|----------------------|--------------------------|-------------------------------|------------------------------|-----------------------------|
| 20             | 0                    | 20                       | 19                            | 7                            | 37%                         |
| 20             | 0                    | 20                       | 19                            | 9                            | 47%                         |
| 15             | 5                    | 20                       | 17                            | 13                           | 76%                         |
| 15             | 5                    | 20                       | 21                            | 16                           | 76%                         |
| 10             | 10                   | 20                       | 14                            | 13                           | 93%                         |
| 10             | 10                   | 20                       | 18                            | 17                           | 94%                         |
| 0              | 20                   | 20                       | 17                            | 17                           | 100%                        |
| 0              | 20                   | 20                       | 20                            | 19                           | 95%                         |

All zygotes were derived from B6D2F2/J and treated with acidic Tyrode's solution for 10 seconds before electroporation. Embryos used in this experiment had not been exposed to CRISPR/Cas reagents.
