# Supplementary material
Source: PubMed Central journal article supplement (PMC4492369)
Supplement: 10.1534_115.176594_genetics.115.176594-3.pdf [file 10.1534_115.176594_genetics.115.176594-3.pdf]

**Table S5 Oligonucleotides used in this study.**

Oligonucleotides used in a PCR reaction to generate DNA template for in vitro transcription of the Cas9 mRNA

| Gene | Direction | Sequence (5' to 3')                           | Template                        |
|------|-----------|-----------------------------------------------|---------------------------------|
| Cas9 | F         | TAATACGACTCACTATAGGGAGA<br>CCACC              | Px330 (Cong <i>et al.</i> 2013) |
|      | R         | ATGGACTATAAGGACCACGAC<br>GCGAGCTCTAGgaattctaC |                                 |

Oligonucleotides used in a PCR reaction to generate DNA template for in vitro transcription of the Tet1 and Tet2 single guide RNA

| sgRNA       | Direction | Sequence (5' to 3')                                                                  |
|-------------|-----------|--------------------------------------------------------------------------------------|
| sgRNA       | R         | AAAAGCACCGACTCGGTGCCACTTTTTCAAGTTGATAACGG<br>ACTAGCCTTATTTTAACTTGCTATTTCTAGCTCTAAAAC |
| <i>Tet1</i> | F         | TAATACGACTCACTATAG ggctgctgtcagggagctca<br>gtttAagagctaTGCTGGAAAC                    |
| <i>Tet2</i> | F         | TAATACGACTCACTATAG gaaagtccaacagatatcc<br>gtttAagagctaTGCTGGAAAC                     |

Oligonucleotide used as donor for HDR-mediated repair at the *Tet2* locus

| Gene target                      | Sequence (5' to 3')                                                                                                            |
|----------------------------------|--------------------------------------------------------------------------------------------------------------------------------|
| <i>Tet2</i><br>EcoRV to<br>EcoRI | tcactctgtgactataaggctctgactctcaagtcacagaaacacgtgaaagtccaacaGAatTCcaggc<br>tcagaatcggagaaccacgcccagctgcagagcctcaagcaaccaaagcaca |

Forward and reverse primers used to produce DNA template for in vitro transcription of sgRNA and guide sequences for the 10 genes from the study

| Name           | Sequence (5' to 3')                                                             |
|----------------|---------------------------------------------------------------------------------|
| sgRNA_F        | gaaattaatacagactcactatagg(N20)gttttagagctagaaatagc                              |
| sgRNA_R        | aaaagcaccgactcgtgccacttttcaagtgataacggactagccttatttaactgc<br>tatttctagctctaaaac |
| <i>Cd69</i>    | TTCTGAAAAC TTTCTATAA                                                            |
| <i>Cd226</i>   | AAGTCCTGAGTCAGCGGCCA                                                            |
| <i>Clec16a</i> | GAGATGGTGATCATGAAGCT                                                            |
| <i>Cyp27b1</i> | CAACCAGTTGGGCATCGCCA                                                            |
| <i>Fut2</i>    | ATGTAGCATATTCGCCCATC                                                            |
| <i>Ormdl3</i>  | ACACGGGTGATGAACAGTCG                                                            |
| <i>Rgs1</i>    | CGGCAGCCATCTCCATGCCA                                                            |
| <i>Tlr7</i>    | ATTTACAGGTGTTTTCGATG                                                            |

|               |                      |
|---------------|----------------------|
| <i>Tlr8</i>   | CGTCAGAATCCATGACTGAG |
| <i>Tnfsf9</i> | GCACTGACCGACCGTGGTAA |
