# Supplementary material
Source: PubMed Central journal article supplement (PMC4492369)
Supplement: 10.1534_115.176594_genetics.115.176594-4.pdf [file 10.1534_115.176594_genetics.115.176594-4.pdf]

**Table S1 Effect of voltage and pulse interval on embryo survival**

| <b>Voltage (v)</b> | <b>Pulse Interval (ms)</b> | <b>Zygotes Electroporated</b> | <b>Blastocysts Developed</b> | <b>Embryo Survival Rate</b> |
|--------------------|----------------------------|-------------------------------|------------------------------|-----------------------------|
| 30                 | 100                        | 13                            | 12                           | 92%                         |
| 30                 | 500                        | 13                            | 9                            | 69%                         |
| 30                 | 1000                       | 10                            | 8                            | 80%                         |
| 100                | 100                        | 10                            | 2                            | 20%                         |
| 100                | 500                        | 11                            | 3                            | 27%                         |
| 100                | 1000                       | 11                            | 2                            | 18%                         |
| 300                | 100                        | 14                            | 0                            | 0                           |
| 300                | 500                        | 12                            | 0                            | 0                           |
| 300                | 1000                       | 14                            | 0                            | 0                           |

All zygotes were derived from B6D2F2/J and treated with acidic Tyrode's solution for 10 seconds before electroporation. The embryos used in this experiment had not been exposed to CRISPR/Cas9 reagents.
