# Supplementary material
Source: PubMed Central journal article supplement (PMC4492369)
Supplement: 10.1534_115.176594_genetics.115.176594-5.pdf [file 10.1534_115.176594_genetics.115.176594-5.pdf]

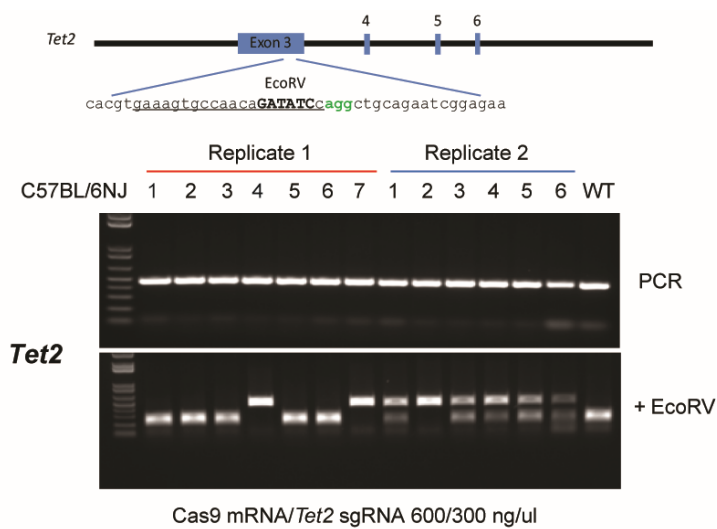

**Figure S2 CRISPR/Cas9 mediated gene editing delivered by ZEN in C57BL/6NJ strain.** The sgRNA-targeting sequence is underlined, and the PAM sequence colored in green. The EcoRV restriction site at the target region is bold and capitalized. RFLP analysis results using EcoRV are shown for mice derived from two replicate experiments.
