# Supplementary material
Source: PubMed Central journal article supplement (PMC4492369)
Supplement: 10.1534_115.176594_genetics.115.176594-6.pdf [file 10.1534_115.176594_genetics.115.176594-6.pdf]

**Table S4 Off target analysis for four mice carrying targeted *Tet2* mutation**

| Site          | Coordinate*                  | Sequence                 | Mismatches | Mutation |
|---------------|------------------------------|--------------------------|------------|----------|
| On Target     | chr3:133148617<br>-133148639 | GAAAGTGCCAACAGATATCCAGG  | none       | yes      |
| Off Target 1  | chr11:31327722<br>-31327744  | aAAAtGTGCaAACAGATATCCTGG | 1,4,9      | No       |
| Off Target 2  | chr8:61482458-<br>61482480   | GAAAagGgCAACAGATATCCTGG  | 5,6,8      | No       |
| Off Target 3  | chr5:134923409<br>-134923431 | GAAcGTGgCAcCAGATATCCTGG  | 4,8,11     | No       |
| Off Target 4  | chr1:73824333-<br>73824355   | GAcAGTGCCAAaAcATATCCTGG  | 3,12,14    | No       |
| Off Target 5  | chr2:150088681<br>-150088703 | cAAAGaGCCAACAGAaATCCAGG  | 1,6,16     | No       |
| Off Target 6  | chr17:36494664<br>-36494686  | GAAgGTGgCAACAGAcATCCTGG  | 4,8,16     | No       |
| Off Target 7  | chr17:36923721<br>-36923743  | GAAgGTGgCAACAGAcATCCTGG  | 4,8,16     | No       |
| Off Target 8  | chr17:36961245<br>-36961267  | GAAgGTGgCAACAGAcATCCTGG  | 4,8,16     | No       |
| Off Target 9  | chr1:89767331-<br>89767353   | GgAAAtGCCAACAGATcTCCTGG  | 2,5,17     | No       |
| Off Target 10 | chr12:4599503-<br>4599525    | GAAAGgGCCAAgAGATgTCCAGG  | 6,12,17    | No       |
| Off Target 11 | chr5:148012894<br>-148012916 | GAAAaTGgCAACAGATAcCCTGG  | 5,8,18     | No       |
| Off Target 12 | chr7:121431500<br>-121431522 | GtAAGTtCCAACAGATATgCTGG  | 2,7,19     | No       |
| Off Target 13 | chr14:26417940<br>-26417962  | GAAgGTGCCAgCAGATATCaAGG  | 4,11,20    | No       |
| Off Target 14 | chr7:115756427<br>-115756449 | GAcAGTGCCAACAGATATagTGG  | 3,19,20    | No       |

\*chromosome coordinate is based on July 2007, NCBI37/mm9.

PCR products were amplified from samples 86EP1, 2, 3, and 4 encompassing the 14 potential off target sites and analyzed by Sanger sequencing. All were found to be wild type at the loci.
