# Supplementary material
Source: PubMed Central journal article supplement (PMC4492369)
Supplement: 10.1534_115.176594_genetics.115.176594-7.pdf [file 10.1534_115.176594_genetics.115.176594-7.pdf]

**Table S3 CRISPR/Cas-mediated HDR at the *Tet2* Locus in Mouse Embryos Delivered by Electroporation**

| <b>Group</b> | <b>Cas9/sgRNA/donor oligo Conc. (ng/ul)</b> | <b>Embryos Electroporated</b> | <b>Blastocysts Developed</b> | <b>NHEJ+ HDR</b> | <b>Efficiency</b> | <b>HDR</b> | <b>Efficiency</b> |
|--------------|---------------------------------------------|-------------------------------|------------------------------|------------------|-------------------|------------|-------------------|
| 1            | 400/200/1000                                | 15                            | 12                           | 9                | 75%               | 4          | 33%               |
| 2            | 600/300/1000                                | 15                            | 13                           | 10               | 77%               | 4          | 31%               |

Zygotes were derived from B6D2F2/J and treated with acidic Tyrode's solution for 10 seconds before electroporation. A total of 15 embryos for each concentration were electroporated in a cuvette of 1 mm gap size and in 20 ul of TE/Opti-MEM at 1:1 volume ratio. Following electroporation, the embryos were transferred to 100 ul of M2 media and cultured in vitro for 3.5 days and blastocysts analyzed.
