# Supplementary material
Source: PubMed Central journal article supplement (PMC4492369)
Supplement: 10.1534_115.176594_genetics.115.176594-8.pdf [file 10.1534_115.176594_genetics.115.176594-8.pdf]

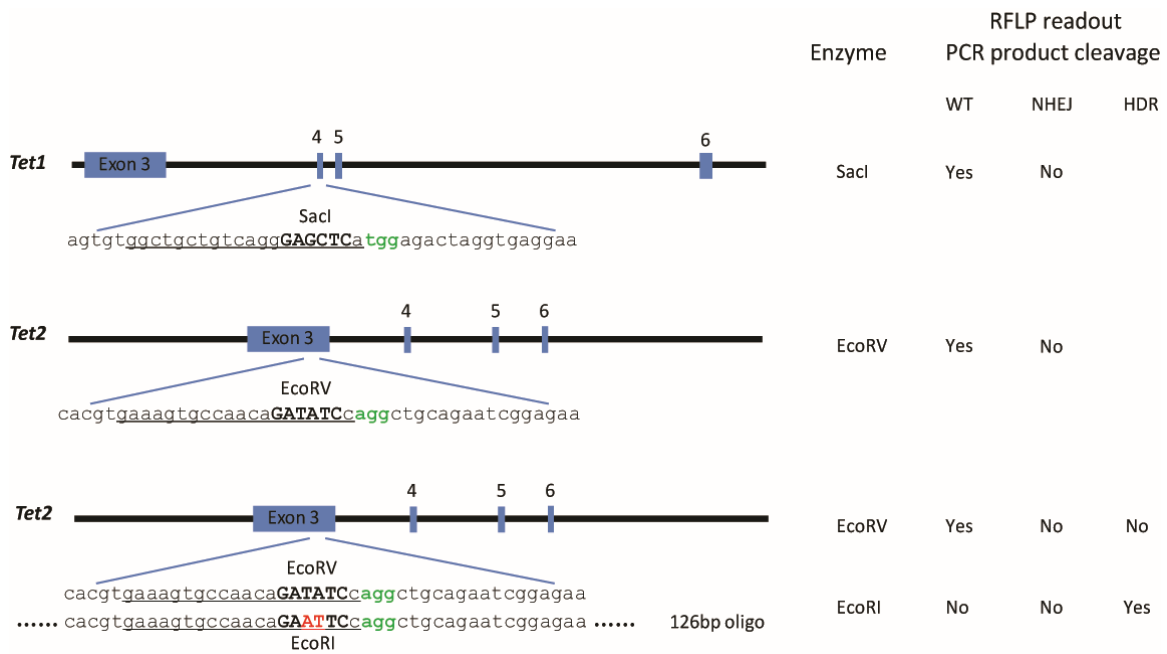

**Figure S1 Schematic of the Cas9/sgRNA-targeting sites at the *Tet1* and *Tet2* loci, and RFLP genotyping strategy.** The sgRNA-targeting sequence is underlined, and the protospacer-adjacent motif (PAM) sequence colored in green. Restriction sites at the target regions are bold and capitalized. Restriction enzymes used for RFLP analysis and the expected results from different alleles are shown in the right panel. Oligonucleotide directed 2bp changes are colored in red.
